# Supplementary material for: Nodulisporic acid produces direct activation and positive allosteric modulation of AVR-14B, a glutamate-gated chloride channel from adult Brugia malayi
Source: PubMed Central journal article supplement — Proc Natl Acad Sci U S A. 2022 Aug 15;119(34):e2111932119. doi: 10.1073/pnas.2111932119 (PMC9407656; doi:10.1073/pnas.2111932119), 2022-08-15
Supplement: pnas.2111932119.sapp.pdf [file pnas.2111932119.sapp.pdf]

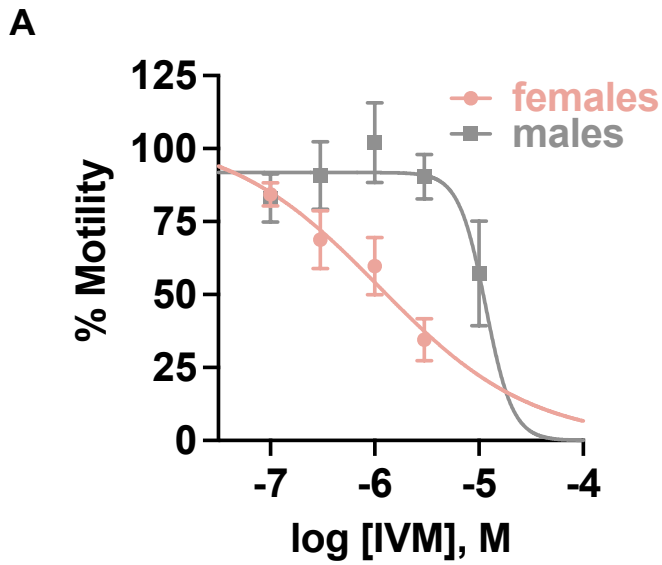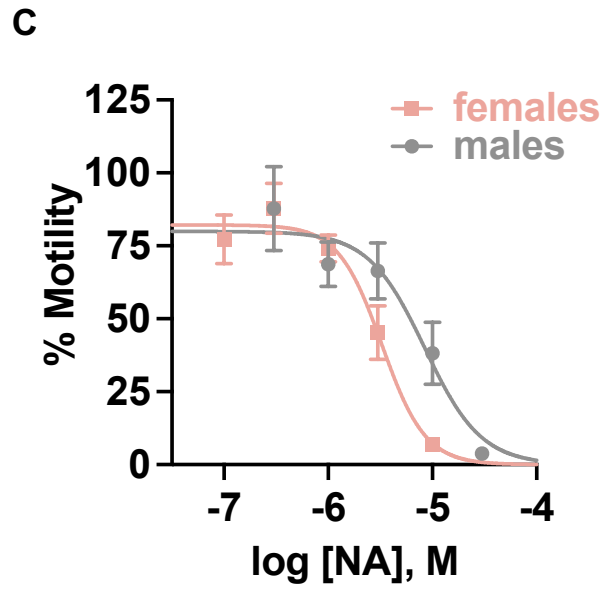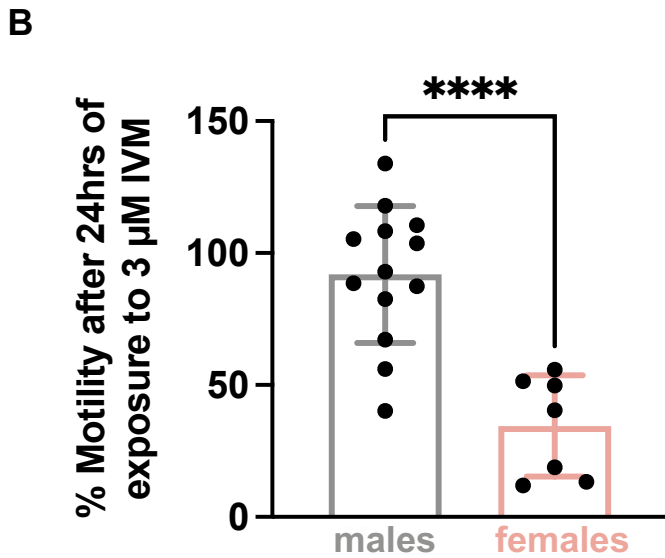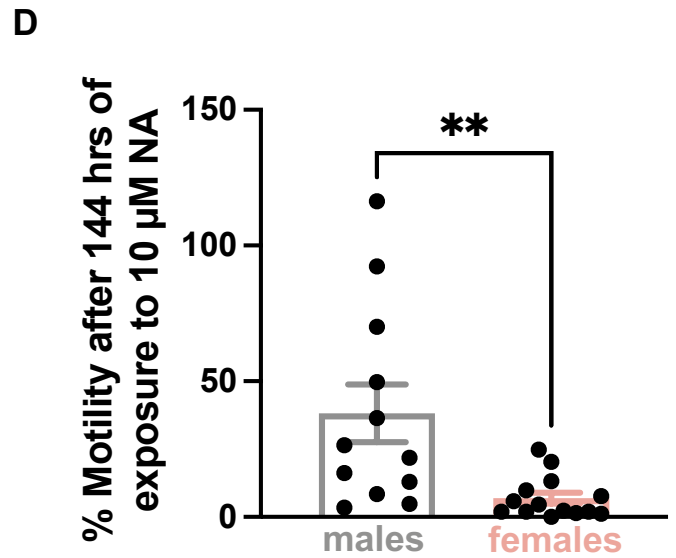

**Fig. S1** Effect of IVM and NA on adult worm motility. (A) Concentration-response relationship of IVM in adult male and female worms after 24 hrs of exposure. The estimated  $IC_{50}$ ,  $pIC_{50}$  and  $n_H$  values in male worms were 11.6  $\mu$ M,  $4.9 \pm 0.2$  and  $-3.4 \pm 12.4$ . In females, the estimated  $IC_{50}$ ,  $pIC_{50}$  and  $n_H$  values were 1.1  $\mu$ M,  $5.9 \pm 0.4$  and  $-0.6 \pm 0.3$ . (B) Sex-dependent effect of 3  $\mu$ M IVM in adult worms after 24 hrs of exposure. The mean response (expressed as mean  $\pm$  SEM, %) for males and females was  $92.0 \pm 7.2$  and  $34.0 \pm 7.3$ , respectively. (C) Concentration-response relationship of NA in adult male and female worms after 144 hrs of exposure. In male worms the estimated  $IC_{50}$  was 8.5  $\mu$ M,  $pIC_{50}$  was  $5.1 \pm 0.1$  and  $n_H$  was  $-2.1 \pm 0.8$ . In females, the estimated  $IC_{50}$ ,  $pIC_{50}$  and  $n_H$  values were 3.3  $\mu$ M,  $5.5 \pm 0.1$  and  $-1.6 \pm 0.7$ . (D) Sex-dependent effect of 10  $\mu$ M NA in adult worms after 144 hrs of exposure. The mean response (expressed as mean  $\pm$  SEM, %) for males and females was  $38.0 \pm 11.0$  and  $6.9 \pm 2.0$ , respectively. (\*\*\*\*  $P \leq 0.0001$ , \*\*  $P \leq 0.005$ ; significantly different as indicated, Two-tailed unpaired t-test).

**A**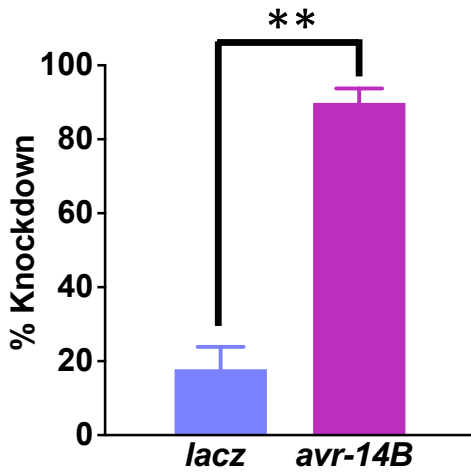**B**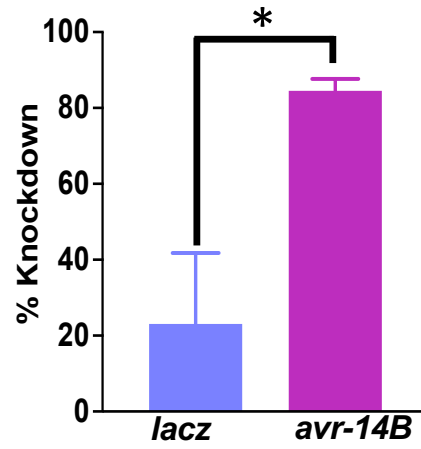

**Fig. S2.** (A) Knock down of *avr-14B* and *lacz* transcript in female worms after 120 hrs of incubation was assayed using qPCR. Knock down of the *avr-14B* transcript (expressed as mean  $\pm$  SEM, %) was  $90 \pm 3.9$  and  $18 \pm 6.1$  in worms treated with *avr-14B* and control *LacZ* dsRNA, respectively. (B) Knock down of *avr-14B* transcript in male worms after 24 hrs of incubation was assayed using qPCR. Knock down of the *avr-14B* transcript (expressed as mean  $\pm$  SEM, %) was  $84 \pm 3.1$  and  $23 \pm 18.7$  in worms treated with *avr-14B* and control *LacZ* dsRNA, respectively. \* $P \leq 0.05$ , \*\* $P \leq 0.01$ ; significantly different as indicated; Two-tailed paired t-test.



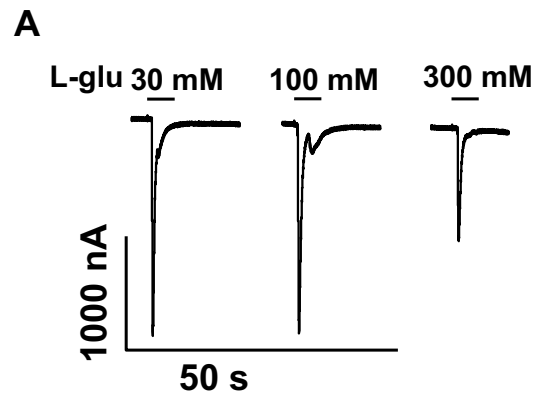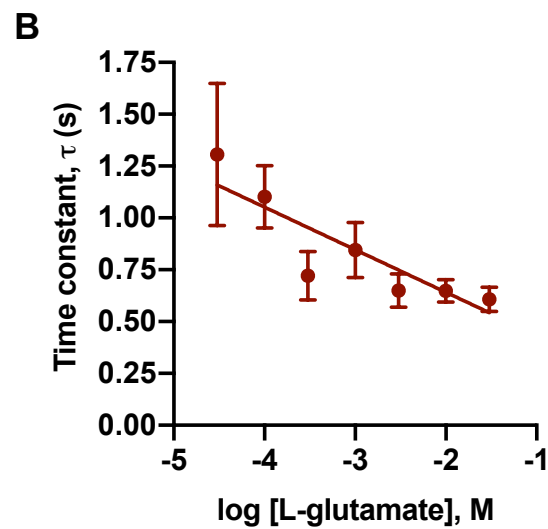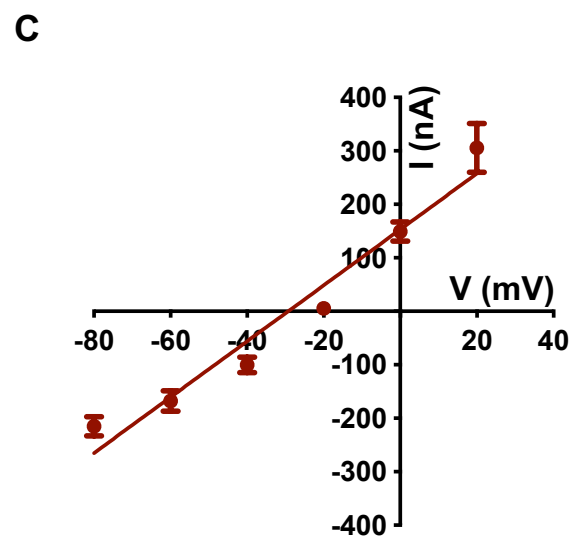

**Fig. S4.** (A) Representative inward current traces for 30 mM, 100 Mm and 300 mM L-glutamate mediated response. (B) Desensitization fit for L-glutamate gated currents. Desensitization time constants ( $\tau$ ) obtained over the entire dose-response relationship are plotted as a function of the agonist concentration. (C) Current-voltage (I-V) relationship plot for L-glutamate-gated currents. Oocytes were held at membrane potentials ranging from  $-80$  to  $+20$  mV and challenged with 1 mM L-glutamate at each holding potential. The reversal potential ( $E_{rev}$ ) was equal to  $-28.9 \pm 2.9$  mV,  $n = 5$ .

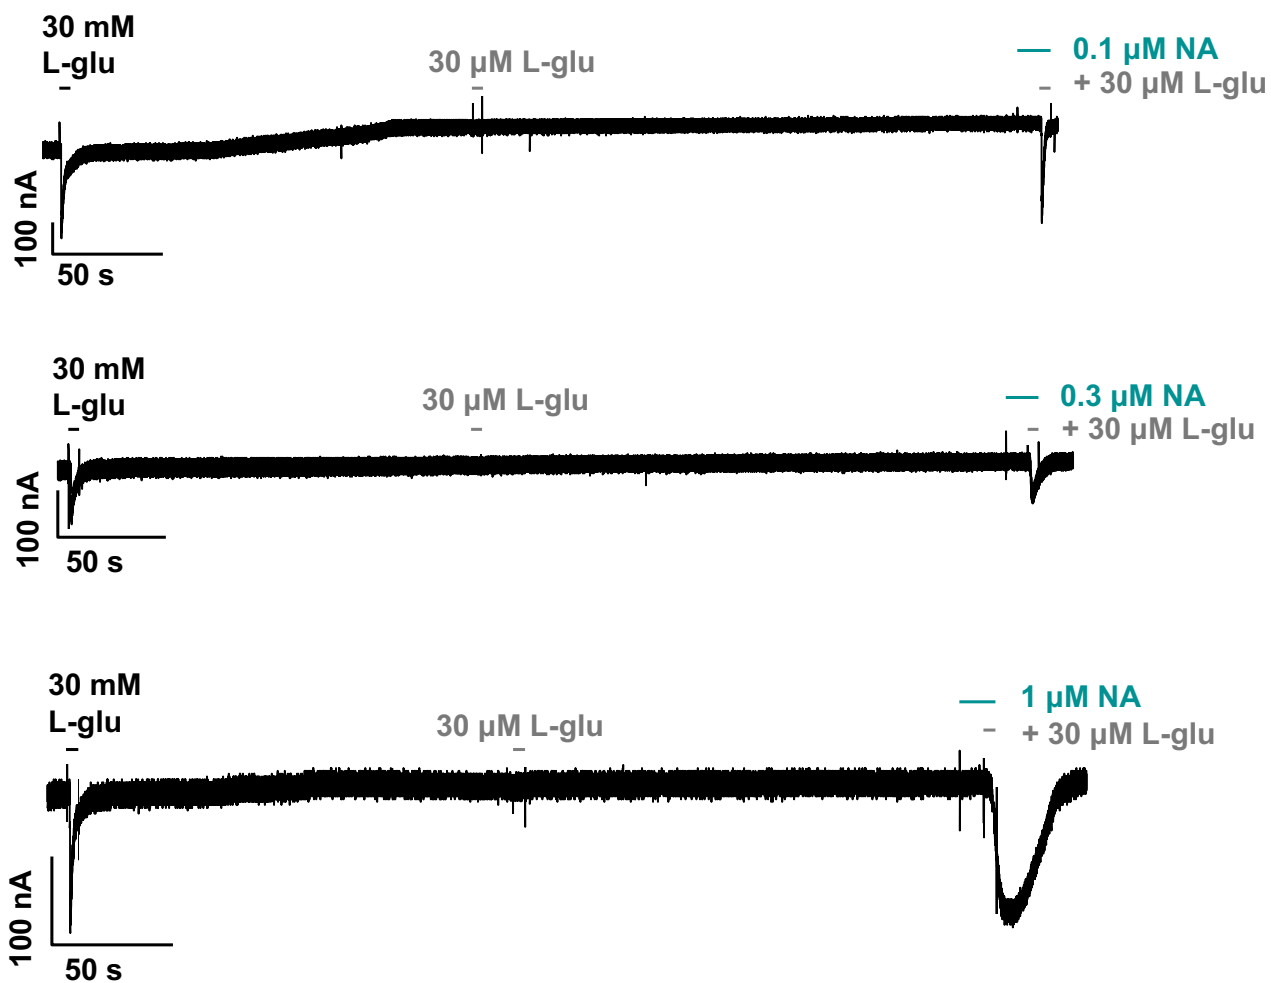

**Fig. S5.** Representative inward current response from oocyte used for studying the positive modulatory effect of NA on L-glutamate (L-glu; 30  $\mu$ M) gated current response ( $n \geq 5$ ).

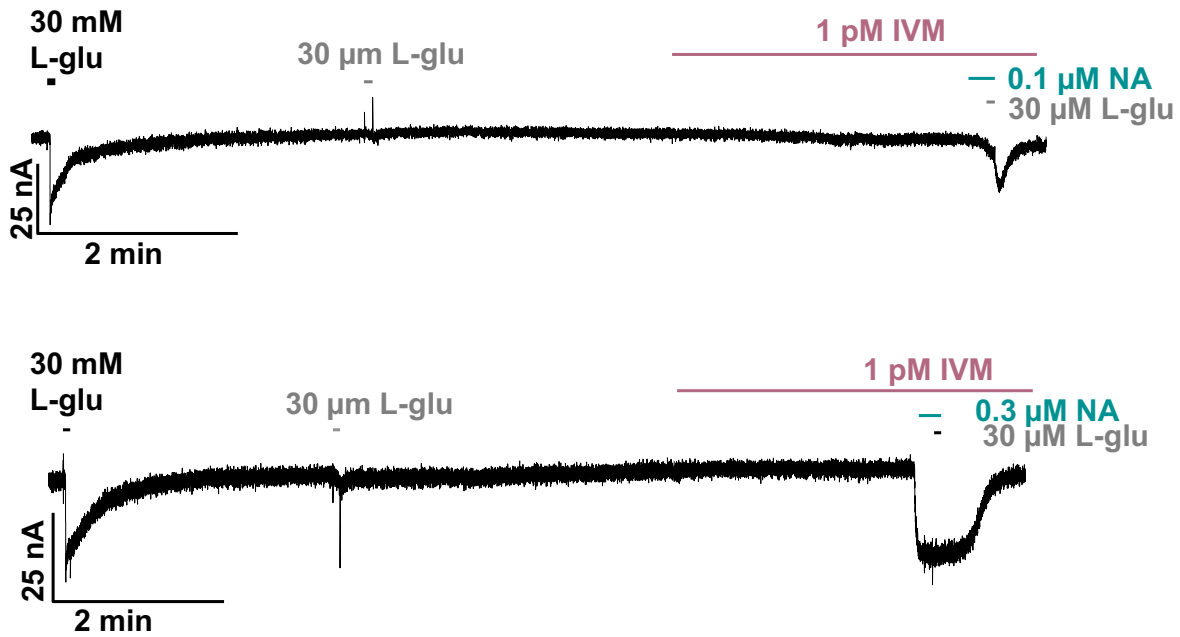

**Fig. S6.** Representative inward current response from oocyte used for studying the modulatory effect 1 pM IVM on NA (0.1  $\mu\text{M}$  and 0.3  $\mu\text{M}$ ) and L-glutamate (L-glu; 30  $\mu\text{M}$ ) gated current response ( $n \geq 5$ ).

**Table 1. A summary of AVR-14 GluCl<sub>s</sub> from various nematodes**

| Organism            | GluCl gene                                                                   | Subunit                         | Tissue distribution                                                                                                           | Pharmacological properties                               |                                                             |                                                          |
|---------------------|------------------------------------------------------------------------------|---------------------------------|-------------------------------------------------------------------------------------------------------------------------------|----------------------------------------------------------|-------------------------------------------------------------|----------------------------------------------------------|
|                     |                                                                              |                                 |                                                                                                                               | Glutamate                                                | IVM                                                         | PTX                                                      |
| <i>C. elegans</i>   | <i>avr-14</i>                                                                | AVR-14A/<br>GluCl $\alpha$ 3A   | neurons in ring ganglion, ventral cord, and mechanosensory neurons <sup>1</sup>                                               | No response <sup>1</sup>                                 | No response <sup>1</sup>                                    | Not determined                                           |
|                     |                                                                              | AVR-14B/<br>GluCl $\alpha$ 3B   | neurons in ring ganglion, ventral cord, and mechanosensory neurons <sup>1</sup>                                               | Sensitive to 10 mM glutamate <sup>1</sup>                | Sensitive to 10 $\mu$ M IVM <sup>1</sup>                    | Not determined                                           |
| <i>H. contortus</i> | <i>avr-14/ gbr-2/ GluCl<math>\alpha</math>3</i>                              | AVR-14A/<br>GluCl $\alpha$ 3A   | amphidial neurons, motor neuron commissures, lateral and ventral nerve cords, and nerve ring <sup>2</sup>                     | No response <sup>3</sup>                                 | No response <sup>3</sup>                                    | Not determined                                           |
|                     |                                                                              | AVR-14B/<br>GluCl $\alpha$ 3B   | pharyngeal neurons, amphidial neurons, motor neuron commissures, lateral and ventral nerve cords, and nerve ring <sup>2</sup> | EC <sub>50</sub> = 27.6 $\pm$ 2.7 $\mu$ M <sup>3</sup>   | estimated EC <sub>50</sub> = ~0.1 $\pm$ 1.0 nM <sup>3</sup> | Inhibits glutamate and IVM induced currents <sup>3</sup> |
| <i>D. immitis</i>   | <i>avr-14</i>                                                                | AVR-14A/<br>GluCl $\alpha$ 3A   | Not determined                                                                                                                | No response <sup>4</sup>                                 | Not determined                                              | Not determined                                           |
|                     |                                                                              | AVR-14B/<br>GluCl $\alpha$ 3B   | Not determined                                                                                                                | Sensitive to glutamate (1–100 mM) <sup>4</sup>           | Sensitive to 1 $\mu$ M IVM <sup>4</sup>                     | Not determined                                           |
| <i>C. oncophora</i> | IVM sensitive (IVS) and IVM resistant (IVR) <i>GluCl<math>\alpha</math>3</i> | IVS AVR-14/<br>GluCl $\alpha$ 3 | Not determined                                                                                                                | EC <sub>50</sub> = 29.7 $\pm$ 4 $\mu$ M <sup>5</sup>     | EC <sub>50</sub> = 0.5 $\pm$ 0.12 $\mu$ M <sup>5</sup>      | Not determined                                           |
|                     |                                                                              | IVR AVR-14/<br>GluCl $\alpha$ 3 | Not determined                                                                                                                | EC <sub>50</sub> = 171.6 $\pm$ 20.7 $\mu$ M <sup>5</sup> | EC <sub>50</sub> = 1.3 $\pm$ 0.11 $\mu$ M <sup>5</sup>      | Not determined                                           |
| <i>A. suum</i>      | <i>gbr-2</i>                                                                 | GBR-2/<br>AVR-14                | Nerve cords <sup>6</sup>                                                                                                      | Not determined                                           | Not determined                                              | Not determined                                           |

<sup>1</sup> J. A. Dent, M. M. Smith, D. K. Vassilatis, L. Avery, The genetics of ivermectin resistance in *Caenorhabditis elegans*. *Proceedings of the National Academy of Sciences* **97**, 2674 (2000).

<sup>2</sup> V. Portillo, S. Jagannathan, A. J. Wolstenholme, Distribution of glutamate-gated chloride channel subunits in the parasitic nematode *Haemonchus contortus*. *Journal of Comparative Neurology* **462**, 213-222 (2003).

- <sup>3</sup>S. McCavera, A. T. Rogers, D. M. Yates, D. J. Woods, A. J. Wolstenholme, An ivermectin-sensitive glutamate-gated chloride channel from the parasitic nematode *Haemonchus contortus*. *Molecular pharmacology* **75**, 1347-1355 (2009).
- <sup>4</sup>D. M. Yates, A. J. Wolstenholme, An ivermectin-sensitive glutamate-gated chloride channel subunit from *Dirofilaria immitis*. *International Journal for Parasitology* **34**, 1075-1081 (2004).
- <sup>5</sup>N. I. Njue, R. K. Prichard, Genetic variability of glutamate-gated chloride channel genes in ivermectin-susceptible and -resistant strains of *Cooperia oncophora*. *Genetic variability of glutamate-gated chloride channel genes in ivermectin-susceptible and -resistant strains of Cooperia oncophora* **129**, 741-751 (2004).
- <sup>6</sup>J S. Jagannathan *et al.*, Ligand-gated chloride channel subunits encoded by the *Haemonchus contortus* and *Ascaris suum* orthologues of the *Caenorhabditis elegans* gbr-2 (avr-14) gene. *Molecular and Biochemical Parasitology* **103**, 129-140 (1999).



**Table S2. List of primers used in the study along with the description and nucleotide sequences.**

| <b>Primer name</b> | <b>Description</b>         | <b>Sequence 5'-3'</b>    |
|--------------------|----------------------------|--------------------------|
| <i>avr-14f</i>     | <i>Bma avr-14</i> dsRNA 5' | GATTGGTGTATGCTTGGCA      |
| <i>avr-14r</i>     | <i>Bma avr-14</i> dsRNA 3' | ACGATTGCCTTAGGTCCTG      |
| <i>gapdhf</i>      | <i>Bma gapdh</i> dsRNA 5'  | GACGCTTCAAGGGAAGTGTTTCTG |
| <i>gapdhr</i>      | <i>Bma gapdh</i> dsRNA 3'  | GTTTTGGCCAGCACCCACGAC    |
| LacZf              | <i>LacZ</i> dsRNA 5'       | CGTAATCATGGTCATAGCTGTTTC |
| LacZr              | <i>LacZ</i> dsRNA 3'       | CTTTTGCTGGCCTTTTGCTC     |
